# Supplementary material for: A Brucella effector modulates the Arf6‐Rab8a GTPase cascade to promote intravacuolar replication
Source: PubMed Central journal article supplement (PMC8488576; doi:10.15252/embj.2021107664), 2021-08-23
Supplement: EMBJ-40-e107664-s006.pdf [file EMBJ-40-e107664-s006.pdf]

## Expanded View Figures

**Figure EV1. BspF localizes to the endosomal recycling compartment.**

- A Representative confocal fluorescence micrograph of HeLa cells co-transfected for 24 h to produce mCherry-BspF and GFP-BspF and treated with Cytochalasin D (200 nM) for 30 min prior to fixation. Scale bars: 10 and 2  $\mu\text{m}$  (insets).
- B Representative confocal fluorescence micrographs of HeLa cells co-transfected for 24 h to produce mCherry-BspF and either GFP-MICAL-L1, GFP-STX16, GFP-STX6, or GFP-VAMP3 and treated with Cytochalasin D (200 nM) for 30 min prior to fixation. Scale bars: 10 and 2  $\mu\text{m}$  (insets). Localization of GFP-MICAL-L1, GFP-STX16, GFP-STX6, or GFP-VAMP3 to mCherry-BspF-labeled tubules was quantified in at least 300 individual cells per experiment. Data are means  $\pm$  SD from  $n = 3$  independent experiments.
- C Representative confocal fluorescence micrographs of HeLa cells co-transfected for 24 h to produce mCherry-BspF and either GFP-Rab11a or VAMP4-GFP and treated with Cytochalasin D (200 nM) for 30 min prior to fixation. Scale bars: 10 and 2  $\mu\text{m}$  (insets). Localization of GFP-Rab11a or VAMP4-GFP to mCherry-BspF-labeled tubules was quantified in at least 300 individual cells per experiment. Data are means  $\pm$  SD from  $n = 3$  independent experiments.

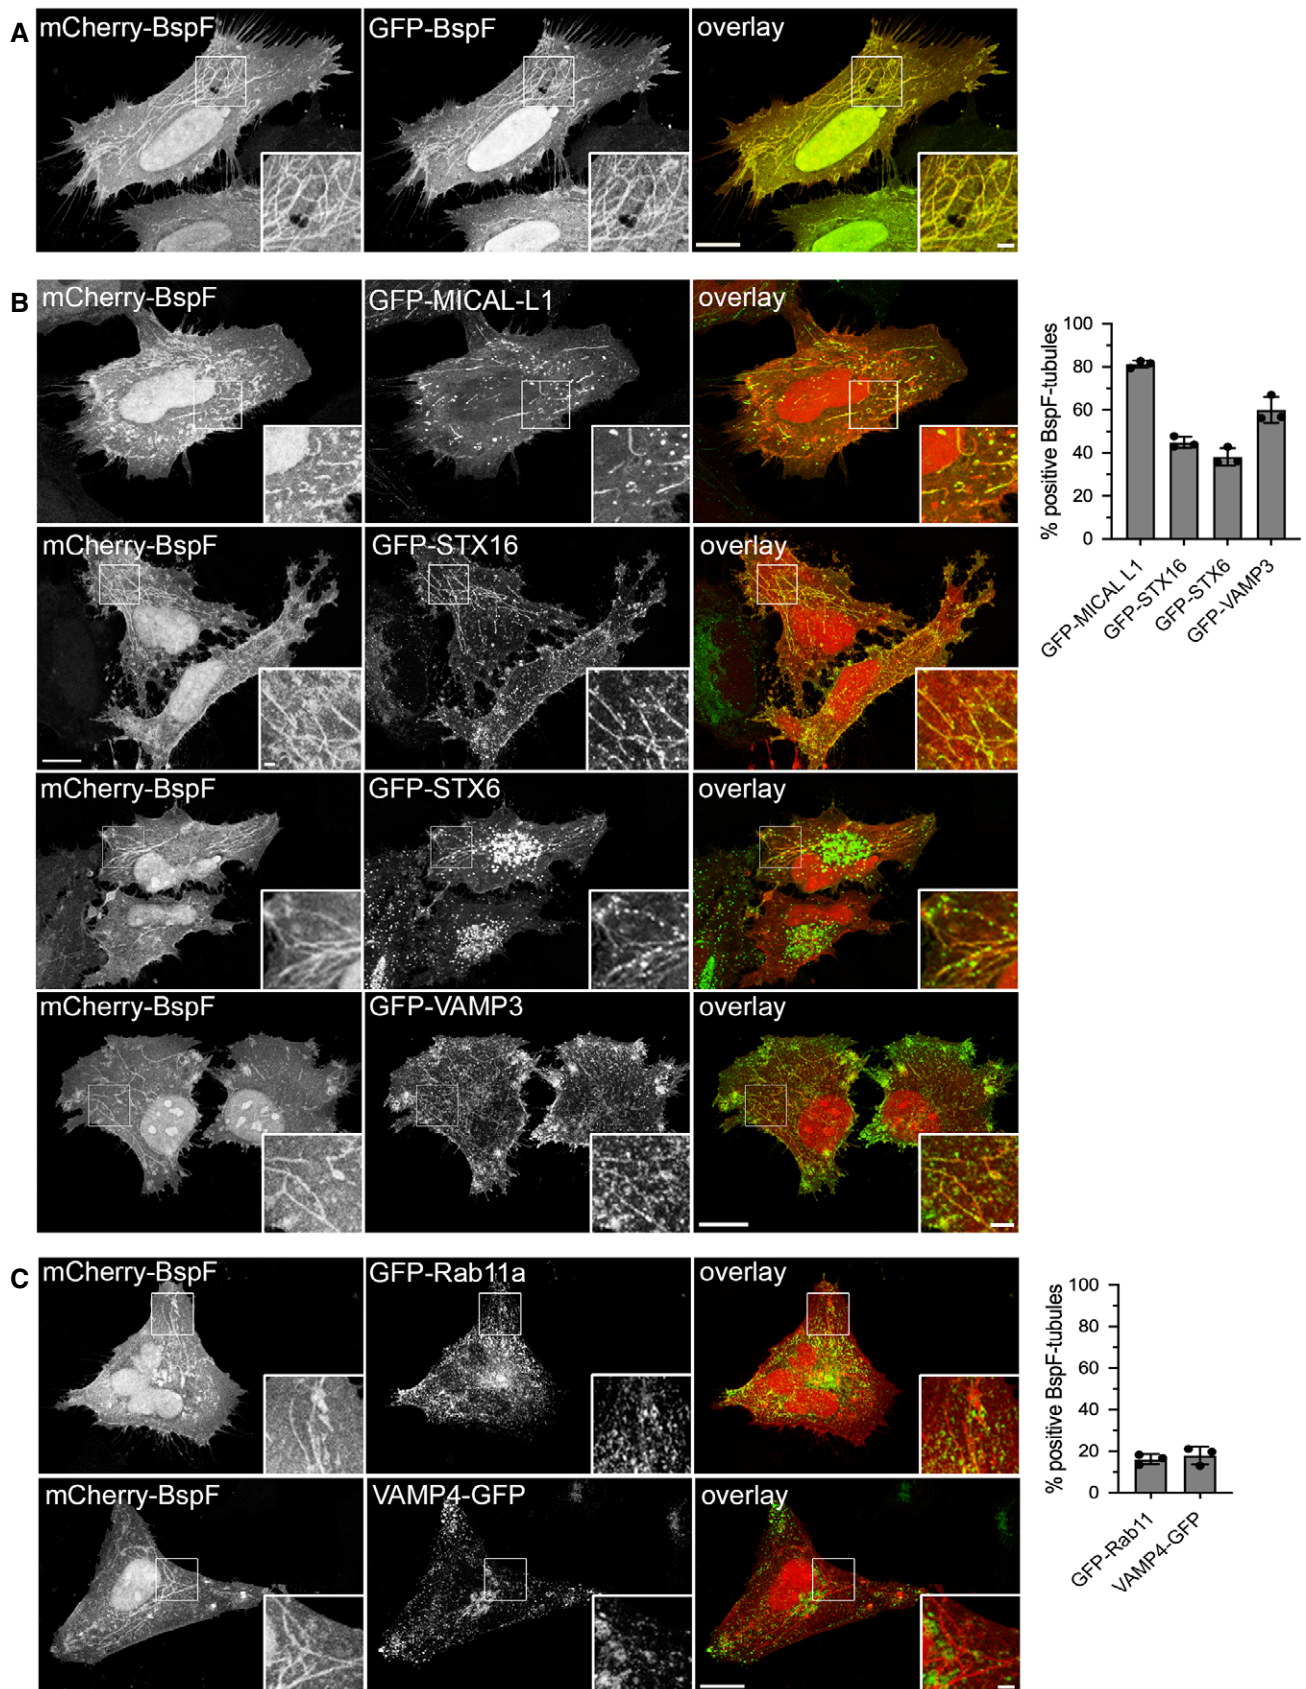

Figure EV1.

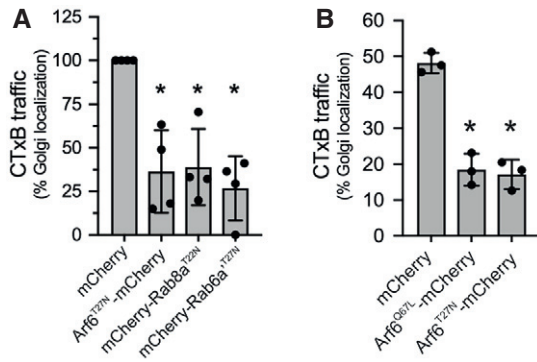

**Figure EV2. Retrograde transport of Cholera toxin depends upon Arf6, Rab8a, and Rab6a' in HeLa cells and BMMs.**

A, B Quantification of CTxB transport to the Golgi apparatus in either HeLa cells producing either mCherry, Arf6<sup>T27N</sup>-mCherry, mCherry-Rab8a<sup>T22N</sup>, or mCherry-Rab6a<sup>T27N</sup> (A), or in BMMs producing either mCherry, Arf6<sup>Q67L</sup>-mCherry, or Arf6<sup>T27N</sup>-mCherry (B). Cells were transfected for 24 h (A) or transduced for 48 h (B) then incubated on ice with AlexaFluor488™-Cholera Toxin subunit B (CTxB) for binding followed by a 20-min (A) or 30-min (B) incubation at 37°C to allow for CTxB retrograde transport to the Golgi apparatus (stained using an anti-GM130 antibody). CTxB retrograde transport is expressed as percentages of cells in which CTxB colocalized with the GM130 Golgi marker. Data are means ± SD from *n* = 3 to 4 independent experiments, in which 100 cells were analyzed per experiment. Asterisks indicate statistically significant differences compared with mCherry-producing cells as determined by a one-way ANOVA with Dunnett's multiple comparisons test (*P* < 0.05).

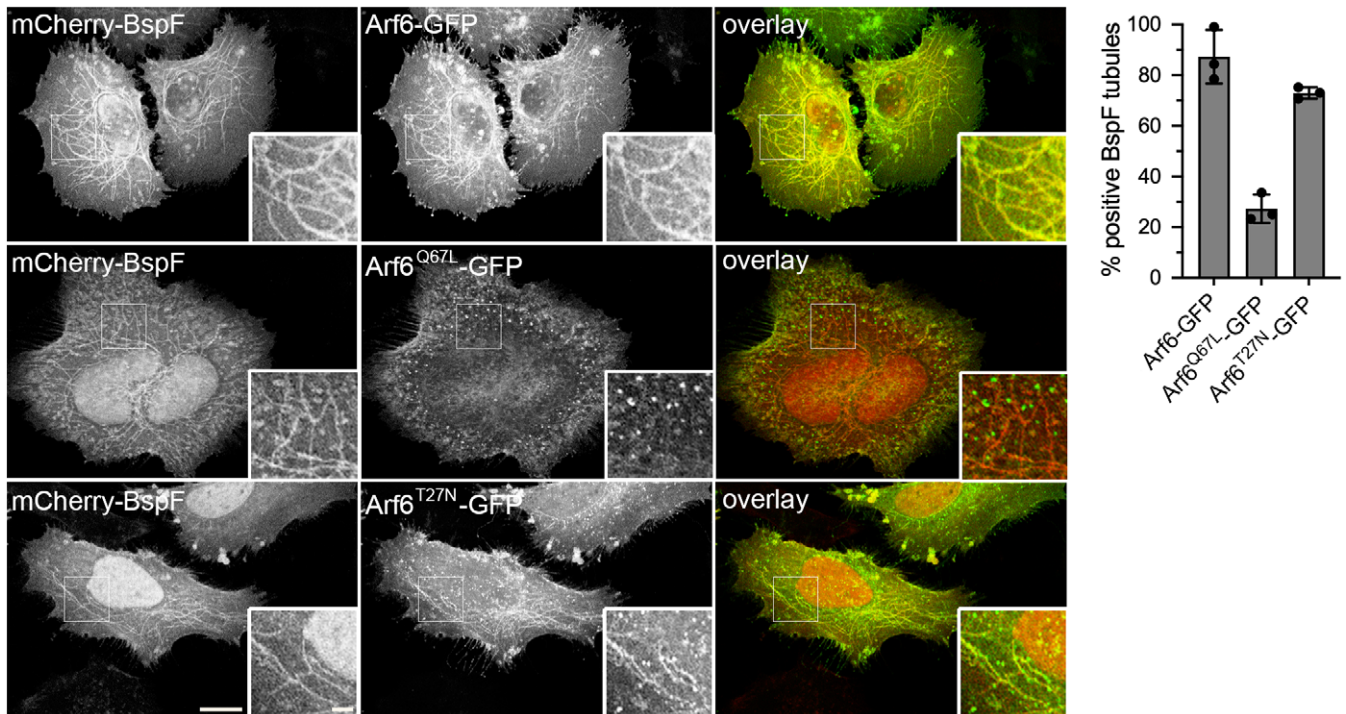

**Figure EV3. Localization of Arf6-GFP alleles to mCherry-BspF-labeled tubules.**

Representative confocal fluorescence micrographs of HeLa cells co-transfected for 24 h to produce mCherry-BspF and either Arf6-GFP, Arf6<sup>Q67L</sup>-GFP, or Arf6<sup>T27N</sup>-GFP and treated with Cytochalasin D (200 nM) for 30 min prior to fixation. Scale bars: 10 and 2 μm (insets). Localization of Arf6-GFP, Arf6<sup>Q67L</sup>-GFP, or Arf6<sup>T27N</sup>-GFP to mCherry-BspF-labeled tubules was quantified in at least 300 individual cells per experiment. Data are means ± SD from *n* = 3 independent experiments.

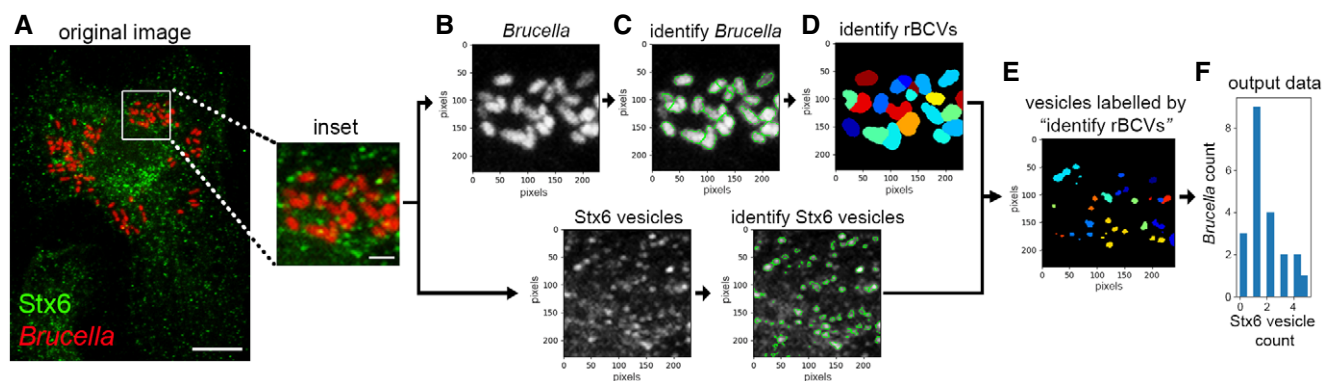

**Figure EV4. CellProfiler analysis pipeline of Stx6-positive vesicle recruitment to rBCVs.**

- A A confocal micrograph inset (10.5  $\mu\text{m}^2$  area) from a BMM infected with wild-type DsRed<sub>m</sub>-expressing *B. abortus* and stained for endogenous Syntaxin 6 (AlexaFluo<sup>TM</sup>488-Stx6) was selected in the DsRed channel (*Brucella*) and input into CellProfiler for analysis. Scale bars, 10 and 2  $\mu\text{m}$ .
- B *Color to gray* module split the red (*Brucella*) and green (Stx6) channels and reverted the images to gray scale.
- C *Identify primary objects* module identified individual *Brucella* and Stx6-positive vesicles based on their size.
- D *Expand or shrink objects* module expanded the size of individual *Brucella* by 6 pixels to encompass whole rBCVs and associated vesicles.
- E *Relate objects* module identified Stx6-positive vesicles within the rBCV area and filtered out non-associated vesicles.
- F *Classify objects* module counted the number of vesicles associated with each rBCV (expanded *Brucella*). X- and y-axes represent pixels coordinates. The output data counted the number of vesicles associated with each *Brucella*, which was derived to determine the percentage of Stx6-positive rBCVs.
